# Supplementary material
Source: PubMed Central journal article supplement (PMC8829626)
Supplement: ajtr0014-0623-f4.pdf [file ajtr0014-0623-f4.pdf]

*OPRM1* genotype modulates responses to cannabis

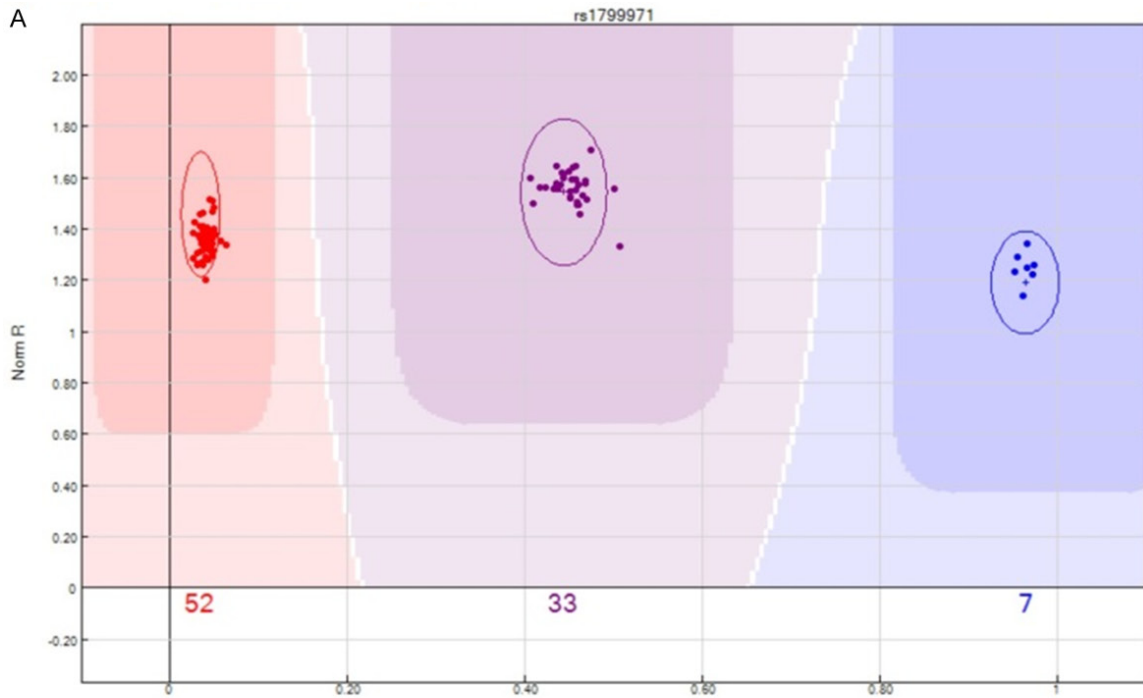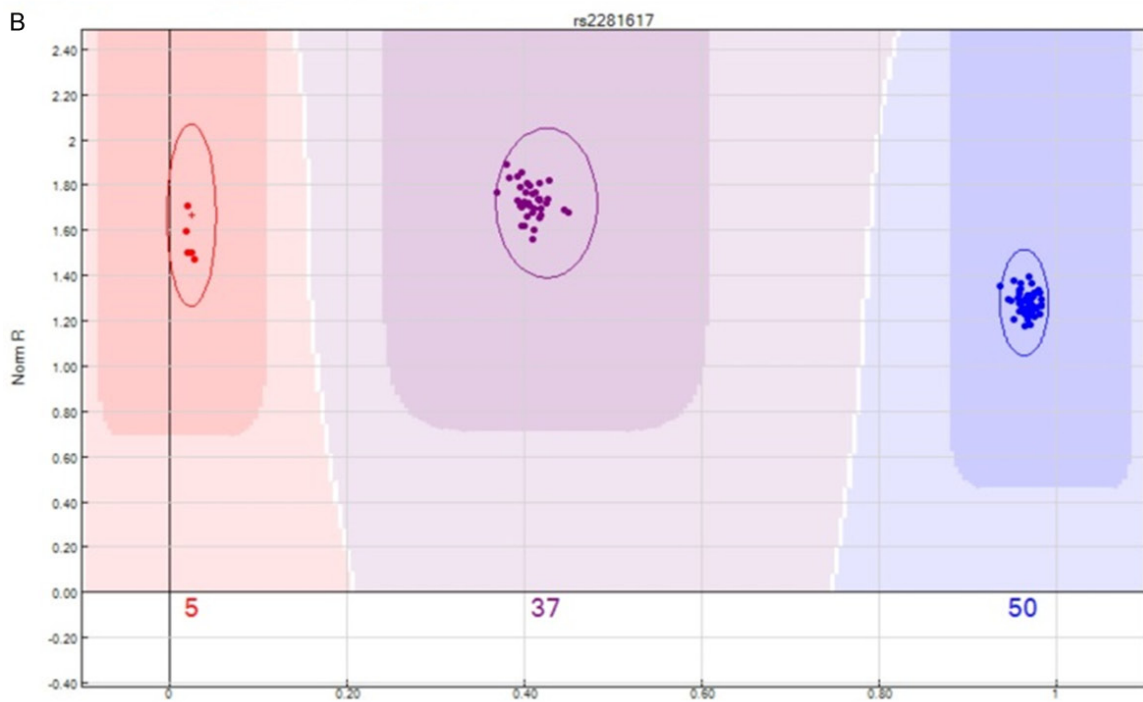

*OPRM1* genotype modulates responses to cannabis

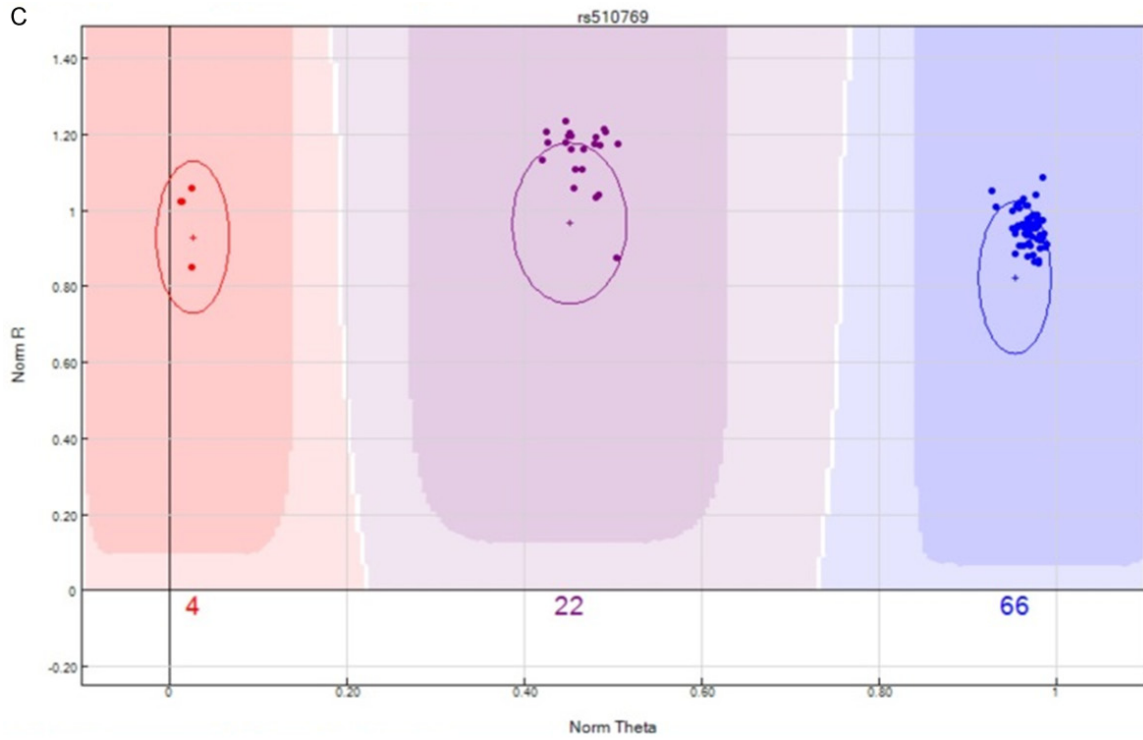

**Supplementary Figure 1.** The cluster plots for *OPRM1* single-nucleotide polymorphisms (SNPs) (A) rs1799971, (B) rs2281617, and (C) rs510769 extracted from the Genome Studio. The x-axis (theta) indicates frequencies of the assigned alleles and the y-axis (R) represents the fluorescence intensity for the allele-specific probes. For each plot, each data point represents a research participant. The color clusters indicate the three genotypes, with the number of each genotype shown below each cluster. The genotype calls for rs1799971 from left to right are AA, AG, and GG. The genotype calls for rs2281617 from left to right are TT, CT, and CC. The genotype calls for rs510769 from left to right are TT, CT, and CC.
